# Supplementary material for: Interferon-γ signaling synergizes with LRRK2 in neurons and microglia derived from human induced pluripotent stem cells
Source: Springer Nature journal article supplement (doi:10.1038/s41467-020-18755-4), 2020-10-14
Supplement: MOESM1 [file 41467_2020_18755_MOESM1_ESM.pdf]

## SUPPLEMENTARY INFORMATION

### **Interferon- $\gamma$ signaling synergizes with LRRK2 in neurons and microglia derived from human induced pluripotent stem cells**

Vasiliki Panagiotakopoulou, Dina Ivanyuk, Silvia De Cicco, Wadood Haq, Aleksandra Arsić, Cong Yu, Daria Messelodi, Marvin Oldrati, David Schöndorf, Maria-Jose Perez, Ruggiero Pio Cassatella, Meike Jakobi, Nicole Schneiderhan-Marra, Thomas Gasser, Ivana Nikić-Spiegel, Michela Deleidi\*

\*Manuscript correspondence:

Michela Deleidi; [michela.deleidi@dzne.de](mailto:michela.deleidi@dzne.de)

## Supplementary Methods

### Primers used for qRT-PCR

|                         |    |                                |
|-------------------------|----|--------------------------------|
| RPLP0                   | FW | CCTCATATCCGGGGGAATGTG          |
|                         | RV | GCAGCAGCTGGCACCTTATTG          |
| HMBS                    | FW | ATGCCCTGGAGAAGAATGAAGT         |
|                         | RV | TTGGGTGAAAGACAACAGCATC         |
| $\beta$ 2-microglobulin | FW | GATAGTTAAGTGGGATCGAG           |
|                         | RV | GCAAGCAAGCAGAATTTGGA           |
| LRRK2                   | FW | TCCCTGCCATACGAGATTACC          |
|                         | RV | GCACATTTTTACGCTCCGATA          |
| NFAT1                   | FW | AGAAACTCGGCTCCAGAATCC          |
|                         | RV | TGGTTGCCCTCATGTTGTTTTT         |
| NFAT2                   | FW | GCCGCAGCACCCCTACCAGT           |
|                         | RV | TTCTTCTCCCGATGTCCGTCTCT        |
| NFAT3                   | FW | TCAGAAGACACGGCGGACTTCC         |
|                         | RV | TGAACATCTGTAGGGTCAGTGG         |
| NFAT4                   | FW | ACCAGCCC GGAGACTTCAATAGA       |
|                         | RV | AAATACCTGCACAATCAATACTGG       |
| PLGC2                   | FW | TCCACCACGGTCAATGTAGAT          |
|                         | RV | GCCTGGGCGGATTTCTTTTAT          |
| IFNGR1                  | FW | CATCACGTCATACCAGCCATTT         |
|                         | RV | CTGGATTGTCTTCGGTATGCAT         |
| SRC                     | FW | TGGCAAGATCACCAGACGG            |
|                         | RV | GGCACCTTTCGTGGTCTCAC           |
| PIK3CB                  | FW | CTAATGTGTCAAGTCGAGGTGGAA       |
|                         | RV | GGAAAATCTCTCGGCAGTCTTGT        |
| IFNG                    | FW | TGACCAGAGCATCCAAAAGA           |
|                         | RV | CTCTTCGACCTCGAAACAGC           |
| MAPK14                  | FW | TTCTGTTGATCCCCTTCACTGT         |
|                         | RV | ACACACATGCACACACACTAAC         |
| AKT1                    | FW | ATGAGCGACGTGGCTATTGTGAAG       |
|                         | RV | GAGGCCGTCAGCCACAGTCTGGATG      |
| EP300                   | FW | AAACCCACCAGATGAGGAC            |
|                         | RV | TATGCACTAGATGGCTCCGCAG         |
| AKT2                    | FW | ATGAATGAGGTGTCTGTCATCAAAGAAGGC |
|                         | RV | TGCTTGAGGCTGTTGGCGACC          |
| CAMK2G                  | FW | ACCCGTTTCACCGACGACTA           |
|                         | RV | CTCCTGCGTGGAGGTTTTCTT          |
| PIK3CD                  | FW | CAACCAGACAGCGGAGCAGCAAGA       |
|                         | RV | CACTTCTGGGTGCGACAAGGAGTCAA     |
| PIK3R1                  | FW | TGACGCTTTC AAACGCTATC          |
|                         | RV | CAGAGAGTACTCTTGCATTC           |
| MAPK1                   | FW | CCAGAGAACCCTGAGGGAGA           |
|                         | RV | TGTTGAGCAGCAGGTTGGAA           |
| IFNGR2                  | FW | GCTGCTCGGAGTCTTCGCCG           |
|                         | RV | GGACTGGCGGCAGTGAAGTC           |
| CBLB                    | FW | CGGTAATTGTTGCGTTTCCA           |
|                         | RV | ACAGCTCGCTCCCGAAGAA            |



|         |    |                              |
|---------|----|------------------------------|
| CDKN1A  | FW | GGCAGACCAGCATGACAGATT        |
|         | RV | GCGGATTAGGGCTTCCTCT          |
| MAP2K6  | FW | GGTTGTCTGGTCACTGAGGTCAC      |
|         | RV | CAGGGAACCTGAGACAGGCTAC       |
| MYC     | FW | GGCCCCAAGGTAGTTATCCTT        |
|         | RV | CGTTTCCGCAACAAGTCCTCT        |
| PRKCD   | FW | CCCTTCTGTGCCGTGAAGAT         |
|         | RV | GCCCGCATTAGCACAATCTG         |
| MAPK3   | FW | CTGGATCAGCTCAACCACATT        |
|         | RV | AGAGACTGTAGGTAGTTTCGGG       |
| CREBBP  | FW | CAACCCCAAAGAGCCAAACT         |
|         | RV | CCTCGTAGAAGCTCCGACAGT        |
| SMAD7   | FW | TACCGTGCAGATCAGCTTTG         |
|         | RV | TTTGCATGAAAAGCAAGCAC         |
| PTPN11  | FW | GTGGAGGAGAACGGTTTGATTG       |
|         | RV | CCAATGTTTCCACCATAGGATTG      |
| BRCA1   | FW | GGCTATCCTCTCAGAGTGACATTT     |
|         | RV | GCTTTATCAGGTTATGTTGCATGGT    |
| CEBPB   | FW | CACAGCGACGACTGCAAGATCC       |
|         | RV | CTTGAACAAGTTCCGCAGGGTG       |
| JAK2    | FW | GATAAAGCACACAGAACTATTCAGAGTC |
|         | RV | AGAATATTCTCGTCTCCACAAAC      |
| eIF2AK2 | FW | TCTTCATGTATGTGACACTGC        |
|         | RV | CACACAGTCAAGGTCCTTAG         |
| AKT3    | FW | ATGAGCGATGTTACCATTGT         |
|         | RV | CAGTCTGTCTGCTACAGCCTGGATA    |
| ICAM1   | FW | AGGCCACCCCAGAGGACAAC         |
|         | RV | CCCATTATGACTGCGGCTGCTA       |
| SOCS1   | FW | TGGTAGCACACAACCAGGTG         |
|         | RV | GAACGGAATGTGCGGAAGT          |
| IRF1    | FW | TGCATTTATTTATACAGTGCCTTGCT   |
|         | RV | CCCTCCCTGGGCCTGTTGAG         |
| STAT1   | FW | CTAGTGGAGTGGAAGCGGAG         |
|         | RV | CACCACAAACGAGCTCTGAA         |

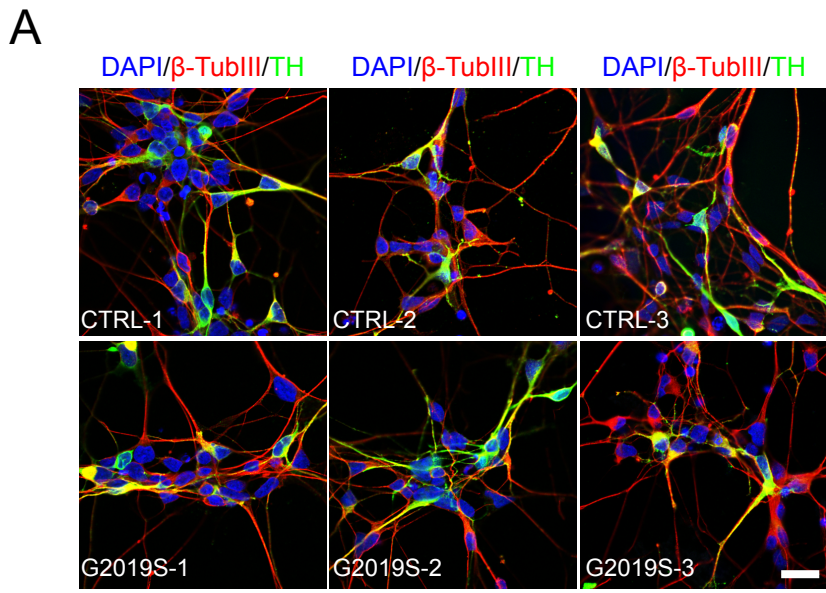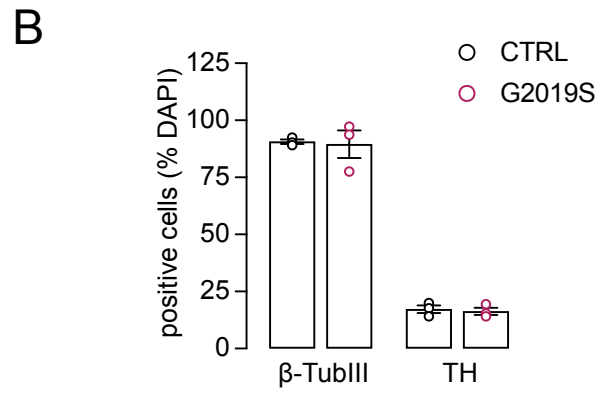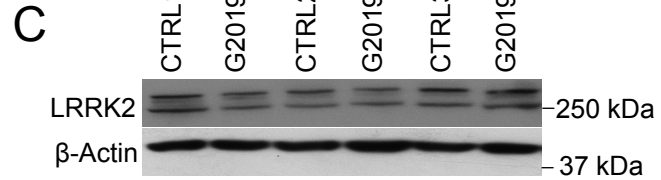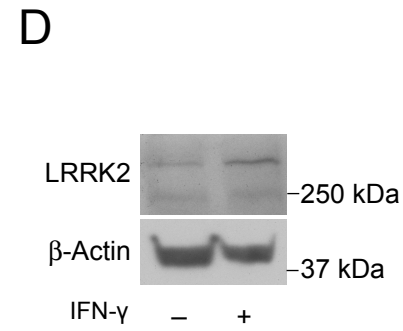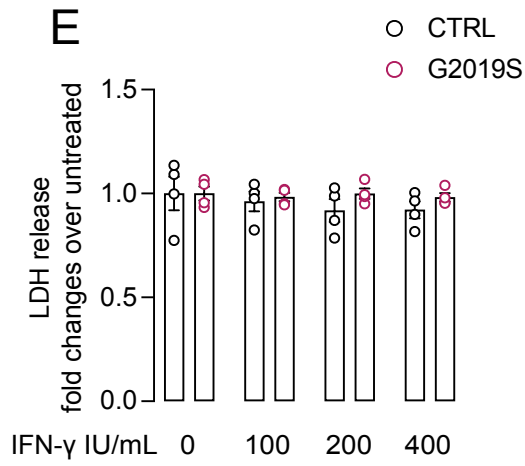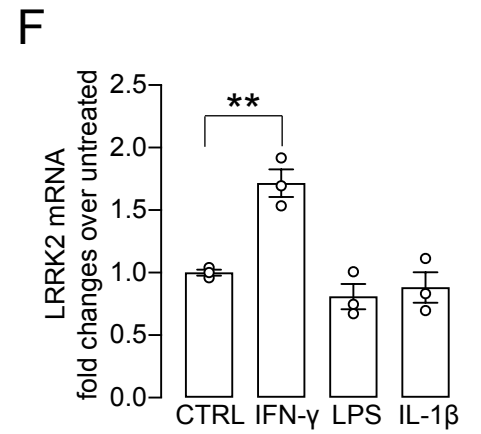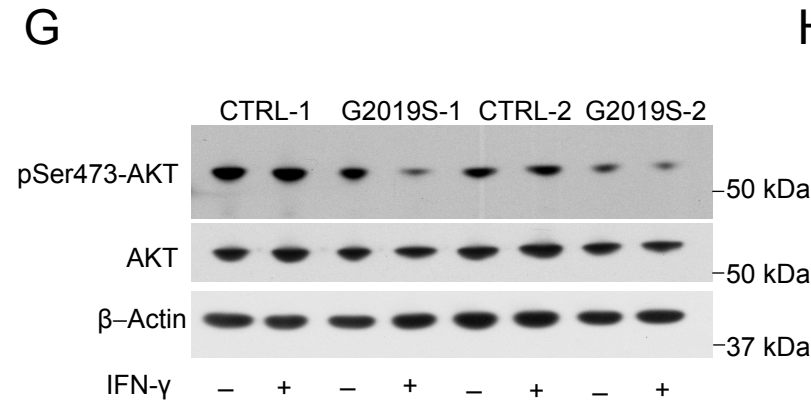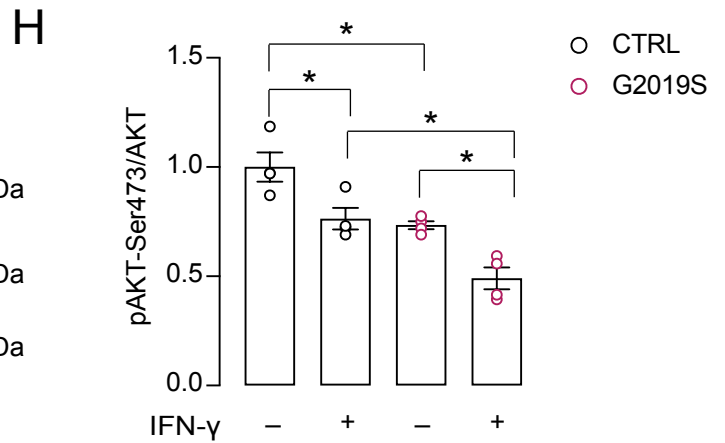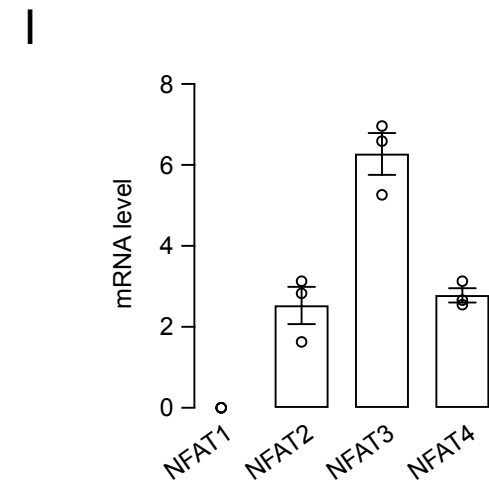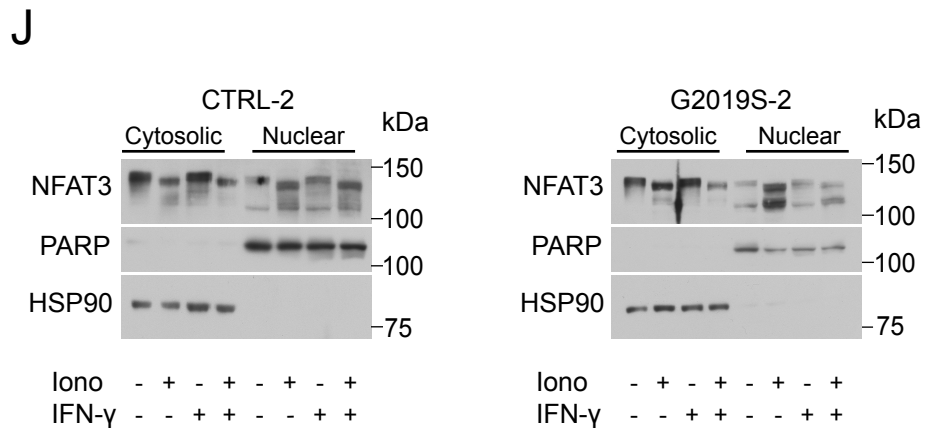

**Supplementary Figure 1. IFN- $\gamma$  synergizes with *LRRK2* G2019S in the negative regulation of NFAT3 shuttling in human neurons.** (A) Immunostaining of differentiated NPC-derived neuronal cultures from *LRRK2* G2019S iPSCs and corresponding isogenic controls. Cells were stained for TH (green) and  $\beta$ -TubIII (red) and nuclei were counterstained with DAPI (blue). Scale bar, 20  $\mu$ m. (B) Quantification of the percentage of  $\beta$ -TubIII- and TH-positive neurons (mean  $\pm$  SEM, n=3 independent experiments). (C) Representative Western blot of *LRRK2* levels in neuronal cultures from *LRRK2* G2019S iPSCs and corresponding isogenic controls. (D) iPSC-derived cortical neurons were treated with 200IU/mL IFN- $\gamma$  for 24 hrs or left untreated; representative Western blot of *LRRK2* levels is shown. (E) *LRRK2* G2019S neurons and controls were treated with IFN- $\gamma$  at given concentrations and cytotoxicity was evaluated by LDH assay. LDH release values were calculated as a percentage relative to control untreated cells lysed with Triton X-100 (mean  $\pm$  SEM; n=4 independent experiments). (F) *LRRK2* mRNA levels in control iPSC-derived neurons treated with 200 IU/mL IFN- $\gamma$ , 100 ng/mL LPS, or 100 IU/mL IL-1 $\beta$  for 24 hrs (mean  $\pm$  SEM, one-way ANOVA, Bonferroni post hoc, \*\* $P=0.0025$ ; n=3 independent experiments). (G) Representative Western blot of p-AKT Ser473 and total AKT in *LRRK2* G2019S neurons (G2019S-1, G2019S-2) and corresponding isogenic controls (CTRL-1, CTRL-2). Treatment with 200 IU/mL IFN- $\gamma$  is indicated. (H) Quantification of pAKT/AKT levels in *LRRK2* G2019S neurons and isogenic controls. Data are normalized to CTRL (mean  $\pm$  SEM, two-way ANOVA, Bonferroni post hoc, \* $P=0.0315$ , 0.0145, 0.0264, 0.0122 in sequence; n=4 independent experiments). (I) mRNA expression of NFAT isoforms in control iPSC-derived neurons measured by qRT-PCR (mean  $\pm$  SEM; n=3 independent experiments). (J) Representative Western blots of NFAT3 in nuclear and cytosolic fractions of control (left panel) and isogenic *LRRK2* G2019S neurons (right panel). Treatment with 1  $\mu$ M ionomycin for 30 min and/or 200 IU/mL IFN- $\gamma$  for 24 hrs is indicated.

**A**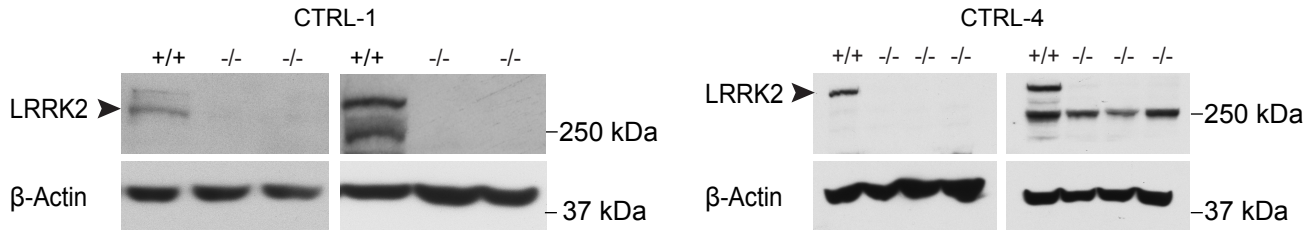**B**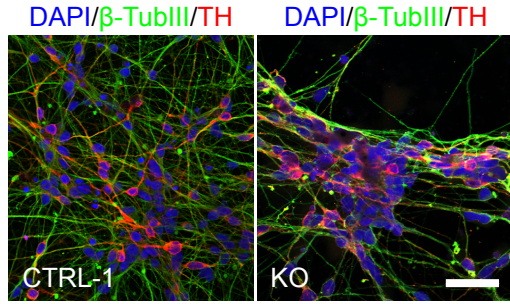**C**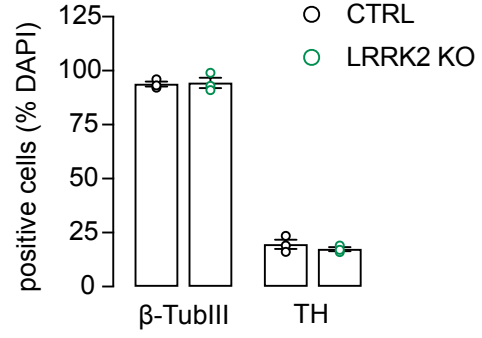**D**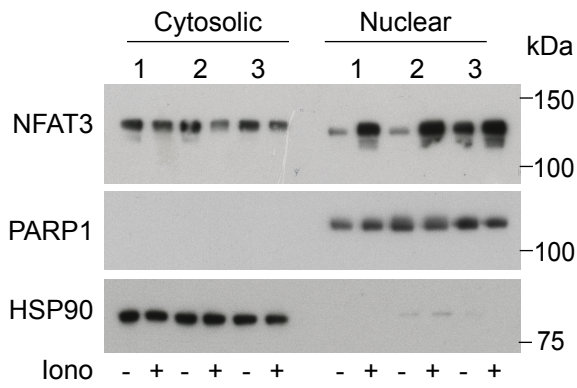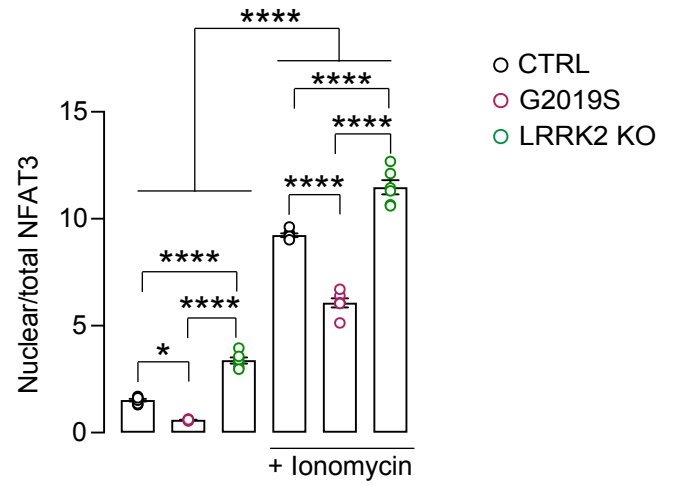

**Supplementary Figure 2. Generation of *LRRK2* KO human iPSCs.** (A) *LRRK2* KO iPSCs (CTRL1) were generated using ZFNs and a targeting vector harboring a premature stop codon in *LRRK2* exon 41 (left). *LRRK2* KO iPSCs (CTRL 4) were generated using CRISPR-Cas9. Two single-guide RNAs (sgRNAs) targeting exon 3 of *LRRK2* were used, leading to a deletion that results in an early stop codon (right). Representative Western blot for LRRK2, showing the absence of LRRK2 in human iPSC-derived microglia. The following antibodies were used: UDD3 30(12) and 24D8 (left panel), 1E11 and 24D8 (right panel). (B) Immunostaining of differentiated iPSC-derived neuronal cultures from *LRRK2* KO and isogenic controls. Cells were stained for TH (red) and  $\beta$ -TubIII (green) and nuclei were counterstained with DAPI (blue). Scale bar, 20  $\mu$ m. (C) Quantification of the percentage of  $\beta$ -TubIII-positive and TH-positive neurons (mean  $\pm$  SEM, n=3 independent experiments). (D) Representative Western blot of NFAT3 in nuclear and cytosolic fractions of control (1), *LRRK2* G2019S (2) and *LRRK2* KO (3) neurons. Treatment with 1  $\mu$ M ionomycin for 30 min is indicated. On the right, quantification of nuclear to total (nuclear and cytosolic fraction) NFAT3 (mean  $\pm$  SEM, two-way ANOVA, Bonferroni post hoc, \*\*\*\* $P$ <0.0001, \* $P$ =0.0150; n=6 independent experiments).

**A**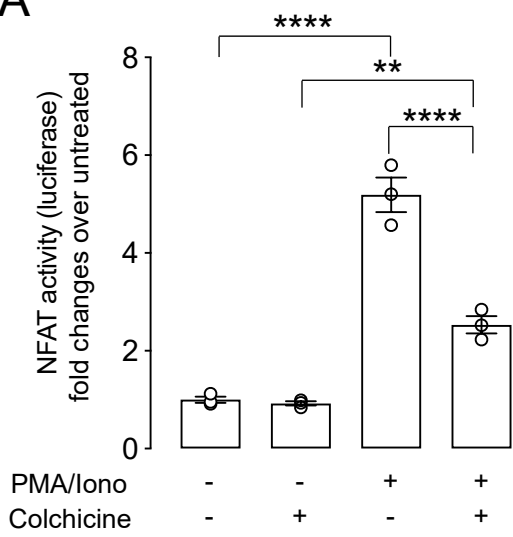**B**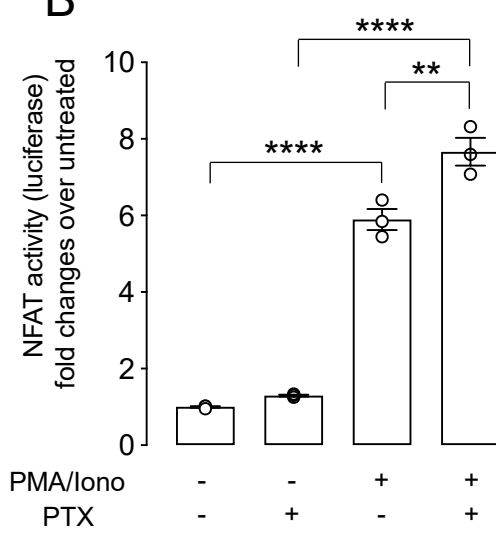**C**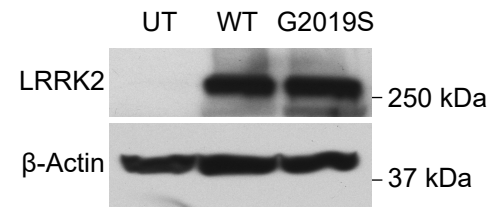**D**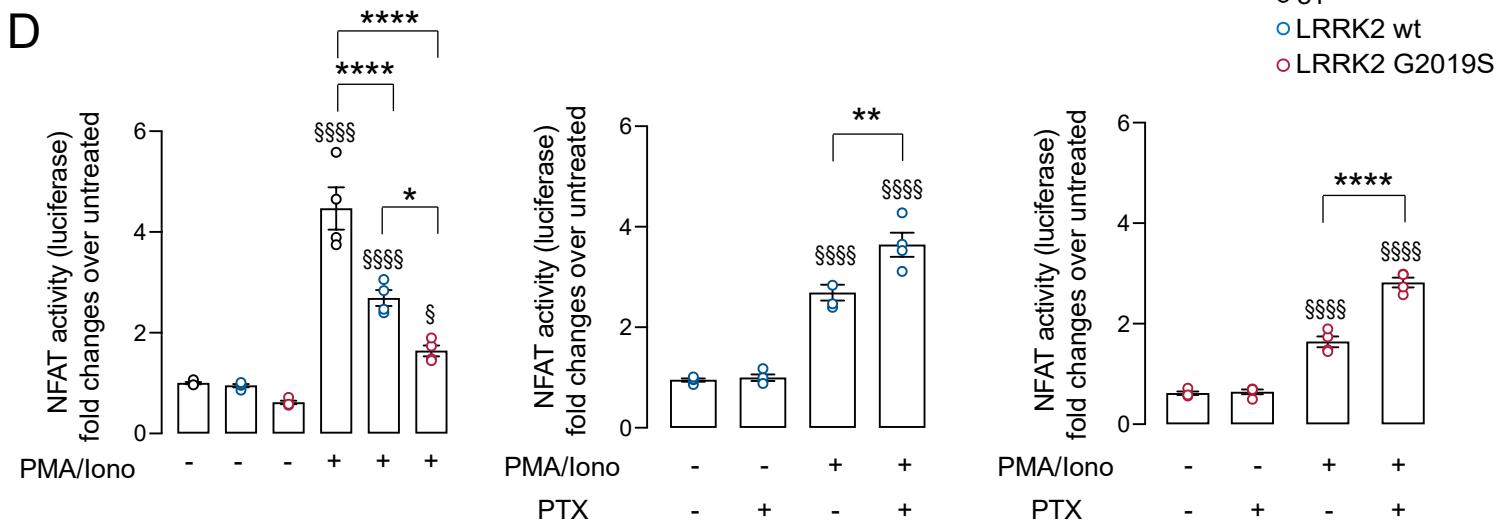**E**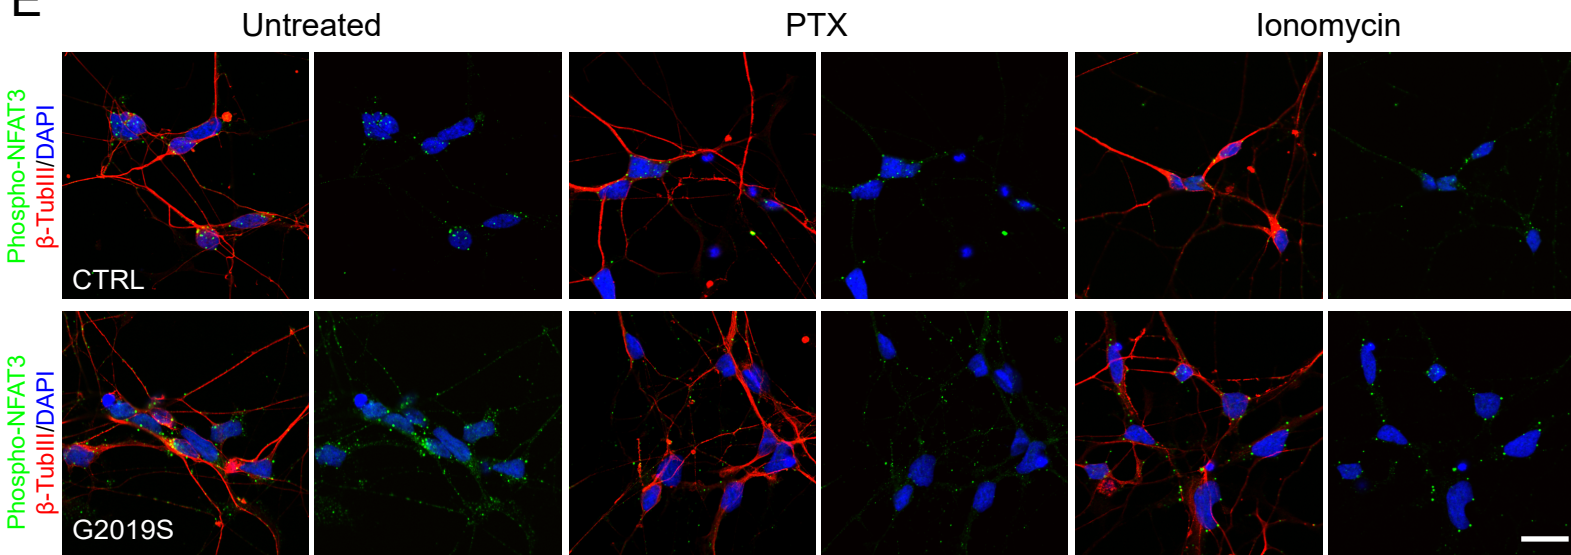**F**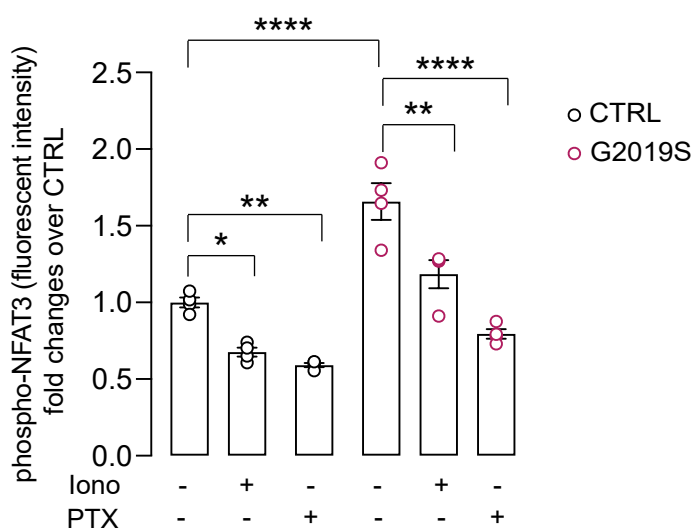

**Supplementary Figure 3. Microtubule network regulates NFAT shuttling.** HEK293 reporter cell lines expressing the luciferase gene under a promoter with NFAT-response elements were treated with microtubule-stabilizing (Paclitaxel, PTX) and destabilizing (Colchicine) agents. **(A)** NFAT-driven luciferase expression in NFAT Reporter - HEK293 cells treated with vehicle or 10 $\mu$ M colchicine for 30 min and stimulated with PMA/Ionomycin (mean  $\pm$  SEM, one-way ANOVA, Bonferroni post hoc, \*\*\*\* $P$ <0.0001, \*\* $P$ =0.0029; n=3 independent experiments). **(B)** NFAT-driven luciferase expression in NFAT Reporter - HEK293 cells treated with vehicle or 100 nM PTX for 24 hrs and stimulated with PMA/Ionomycin (mean  $\pm$  SEM, one-way ANOVA, Bonferroni post hoc, \*\*\*\* $P$ <0.0001; \*\* $P$ =0.0035; n=3 independent experiments). **(C)** Western blot for LRRK2 levels in HEK293 cells untransfected (UT) or transfected with wt or LRRK2 G2019S. **(D)** NFAT-driven luciferase expression in NFAT Reporter - HEK293 cells overexpressing wt or G2019S LRRK2 and stimulated with PMA/Ionomycin alone (left) or in combination with 100 nM PTX treatment (middle and right panels) for 24 hrs. Data are expressed as fold changes over UT untreated (mean  $\pm$  SEM, one-way and two-way ANOVA, Bonferroni post hoc, §§§§ $P$ <0.0001, relative to corresponding untreated; §  $P$ =0.0187; \*\*\*\* $P$ <0.0001, \*\* $P$ =0.0040; \* $P$ =0.0155, n=4 independent experiments). **(E)** Representative confocal images of phospho-NFAT3 immunostaining (green) in *LRRK2* G2019S and isogenic control iPSC-derived neurons treated with 100 nm PTX for 24 hrs or 1  $\mu$ M ionomycin for 30 min.  $\beta$ -TubIII (red), DAPI staining (blue). Scale bar, 20  $\mu$ m. **(F)** Quantification of phospho-NFAT3 fluorescent intensity as assessed by Image J ROI analysis (mean  $\pm$  SEM, two-way ANOVA, Bonferroni post hoc, \*\*\*\* $P$ <0.0001, \*\* $P$ =0.0049, 0.0011 in sequence; \* $P$ =0.0368, n=4 independent experiments).



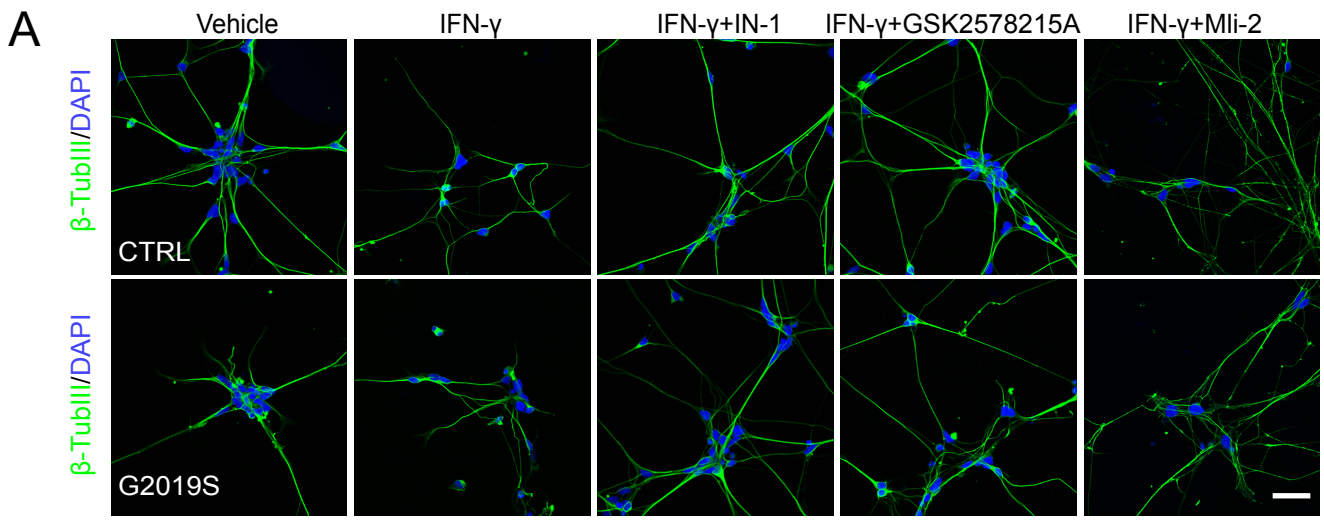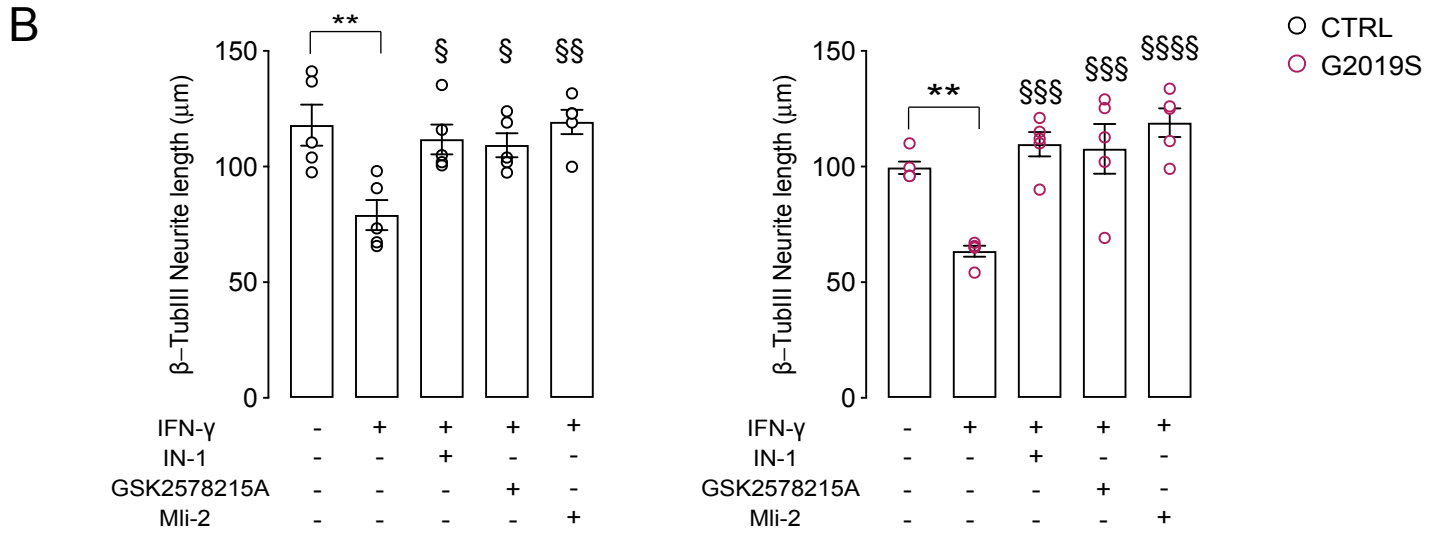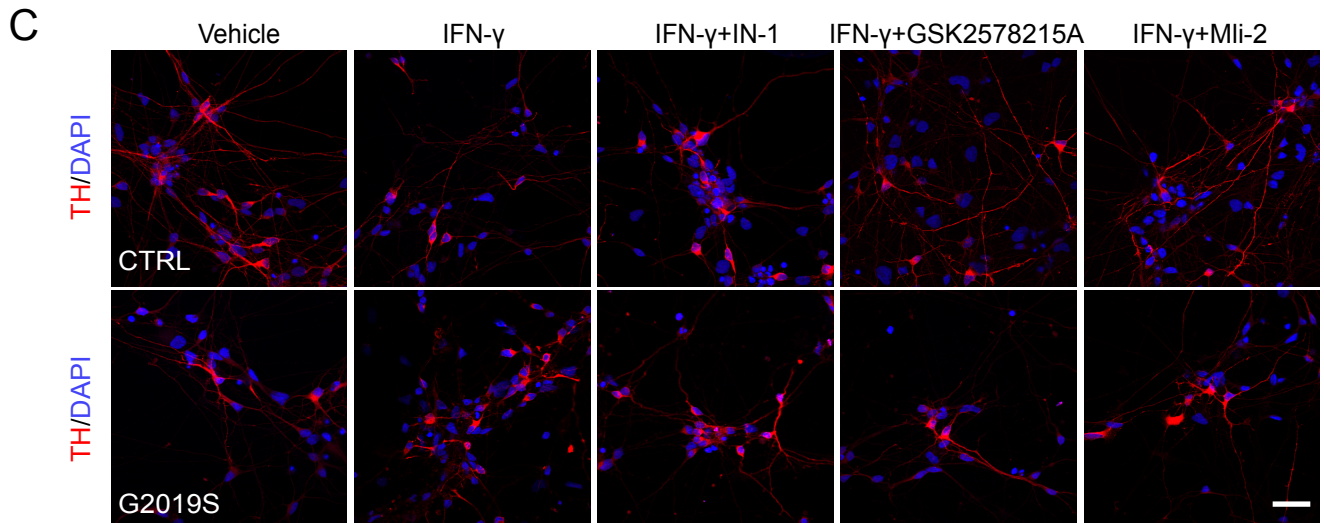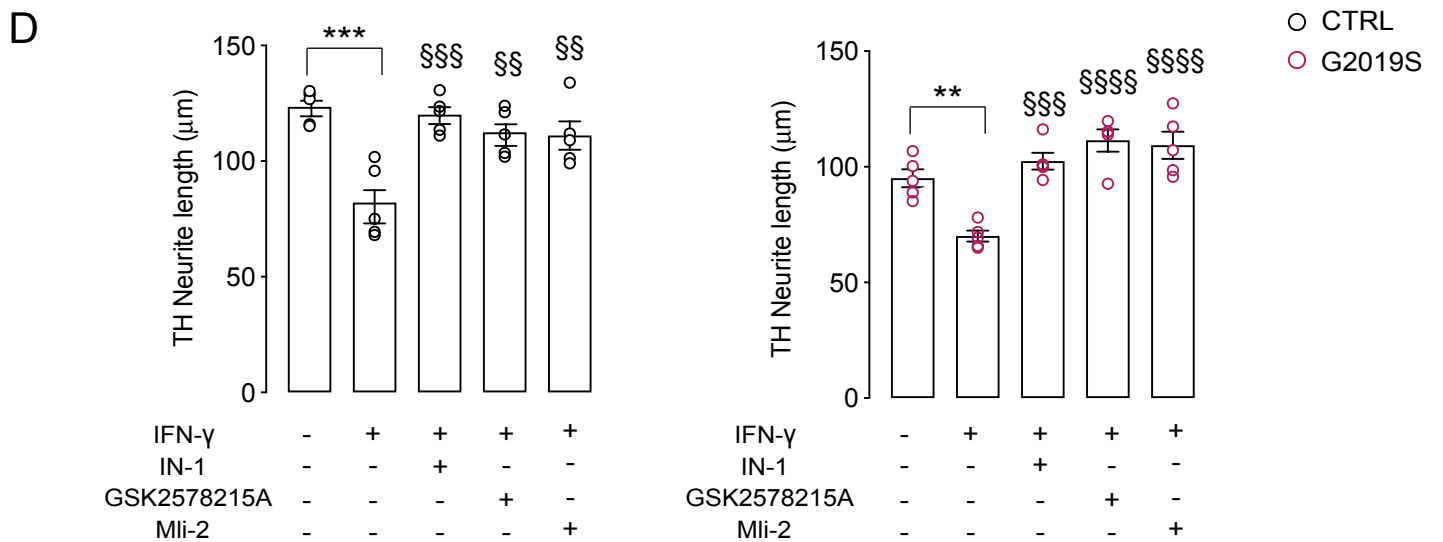



**Supplementary Figure 4. IFN- $\gamma$  reduces neurite outgrowth by decreasing NFAT activity.** *LRRK2* G2019S and isogenic control iPSC-derived neurons were treated with 200IU/mL IFN- $\gamma$  for 24 hrs with or without prior LRRK2 kinase inhibition with 1,5 $\mu$ M IN-1 or 2  $\mu$ M GSK2578215A or 100nM Mli-2. **(A)** Representative images of  $\beta$ -TubIII immunostaining (green) showing neurite elongation; DAPI staining (blue). Scale bar, 50  $\mu$ m. **(B)** Quantification of  $\beta$ -TubIII-positive neurite elongation in control (left panel) and *LRRK2* G2019S (right panel) iPSC-derived neurons (mean  $\pm$  SEM, one-way ANOVA, Bonferroni post hoc, IFN- $\gamma$ -treated vs untreated \*\* $P$ = 0.0046, 0.0055 in sequence; LRRK2 kinase inhibitor-treated vs untreated §§§§ $P$ <0.0001, §§§ $P$ =0.0004, 0.0006 in sequence, §§ $P$ =0.0032, § $P$ =0.0217, 0.0401 in sequence;  $n$ =5 independent experiments). **(C)** Representative images of TH immunostaining (red) showing neurite elongation; DAPI staining (blue). Scale bar, 50  $\mu$ m. **(D)** Quantification of TH-positive neurite elongation in control (left panel) and *LRRK2* G2019S (right panel) iPSC-derived neurons (mean  $\pm$  SEM, one-way ANOVA, Bonferroni post hoc, IFN- $\gamma$ -treated vs untreated \*\*\* $P$ =0.0001, \*\* $P$ =0.0052; LRRK2 kinase inhibitor-treated vs untreated §§§§ $P$ <0.0001, §§§ $P$ =0.0004, 0.0003 in sequence, §§ $P$ =0.0044, 0.0068 in sequence;  $n$ =5 independent experiments).

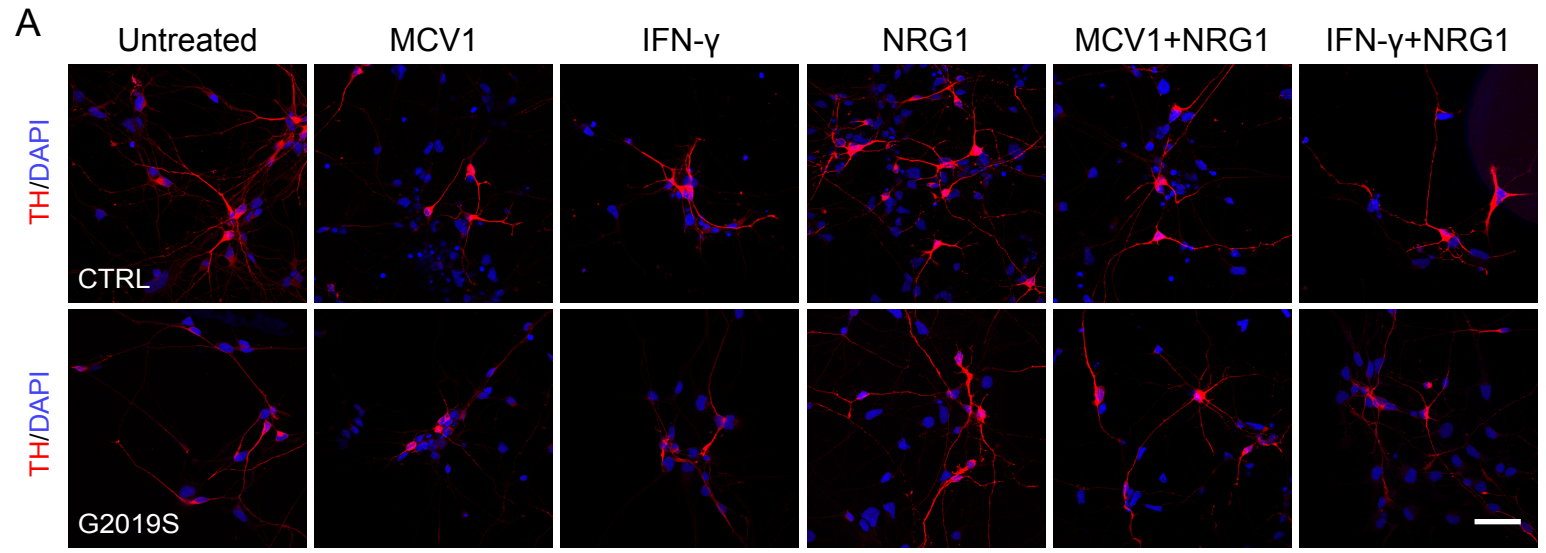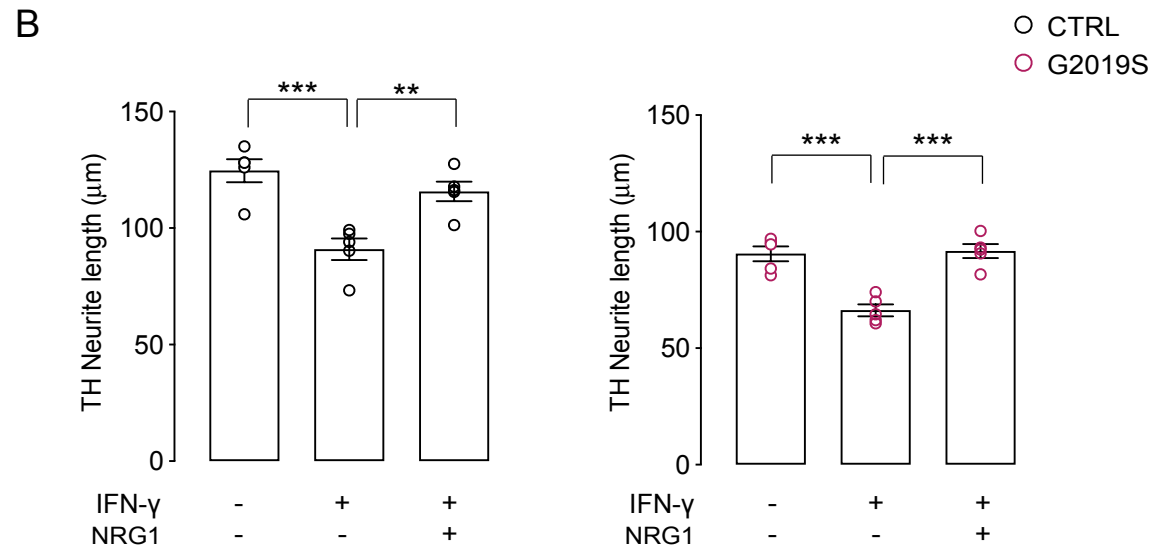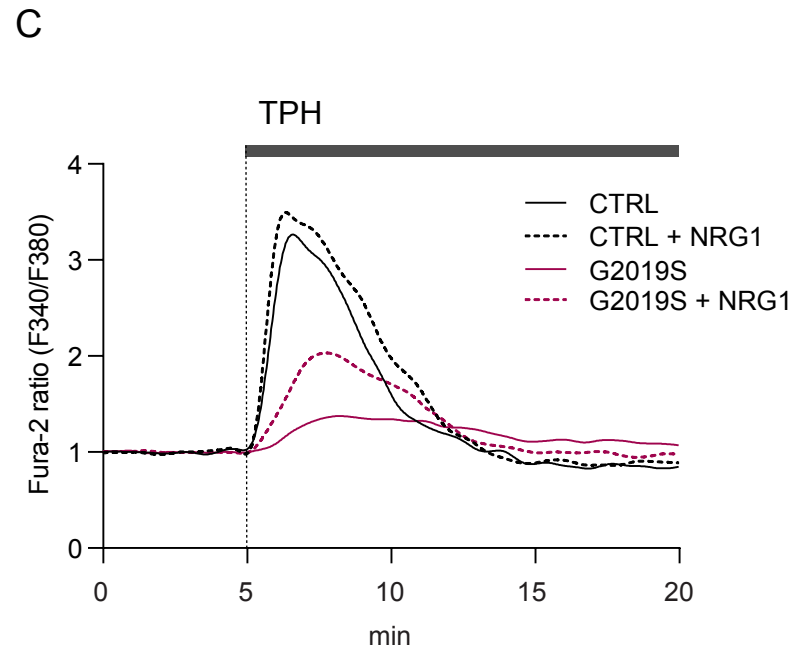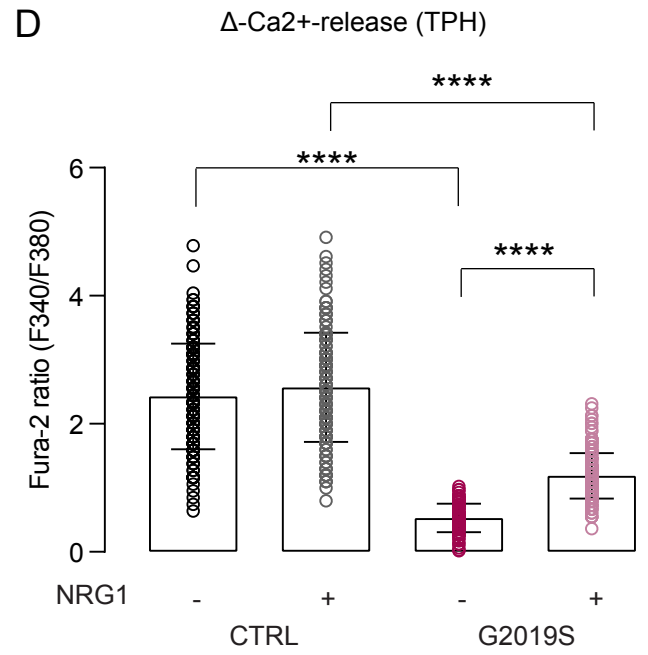

**Supplementary Figure 5. NRG1 rescues the impaired Ca<sup>2+</sup>-storage capacity and neurite length defects induced by the *LRRK2* G2019S mutation and IFN- $\gamma$  treatment. (A)** Representative images of TH immunostaining (red) on *LRRK2* G2019S and isogenic control iPSC-derived neurons treated with 200IU/mL IFN- $\gamma$  for 24 hrs with or without prior treatment with 200ng/mL NRG1 for 24 hrs. DAPI staining (blue). Scale bar, 50  $\mu$ m. **(B)** Quantification of neurite elongation in control (left panel) and *LRRK2* G2019S (right panel) iPSC-derived neurons (mean  $\pm$  SEM, one-way ANOVA, Bonferroni post hoc, \*\*\* $P=0.0007$ , 0.0002, 0.0001 in sequence, \*\* $P=0.0074$ ; n=5 independent experiments). **(C)** Individual Ca<sup>2+</sup> signaling traces of representative isogenic *LRRK2* G2019S and control neurons pretreated with 200 ng/mL NRG1 for 24 h or left untreated. **(D)** Quantification of TPH-mediated  $\Delta$ -Ca<sup>2+</sup> release is shown (mean  $\pm$  SEM, two-way ANOVA, Bonferroni post hoc, \*\*\*\* $P<0.0001$ ; 171 control, 149 NRG1-treated control, 90 G2019S and 200 NRG1-treated G2019S individual cells examined over 3 independent experiments).

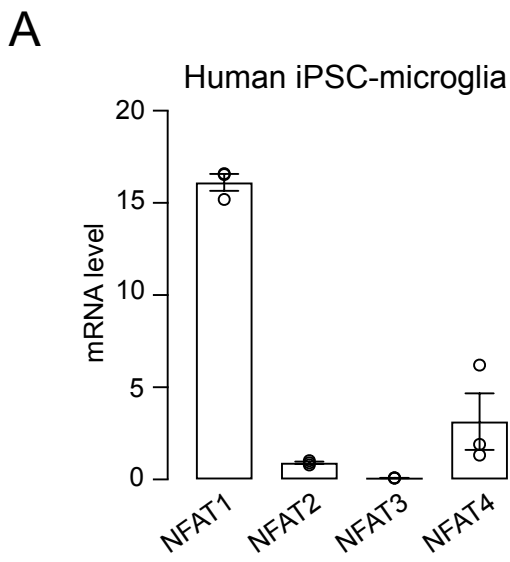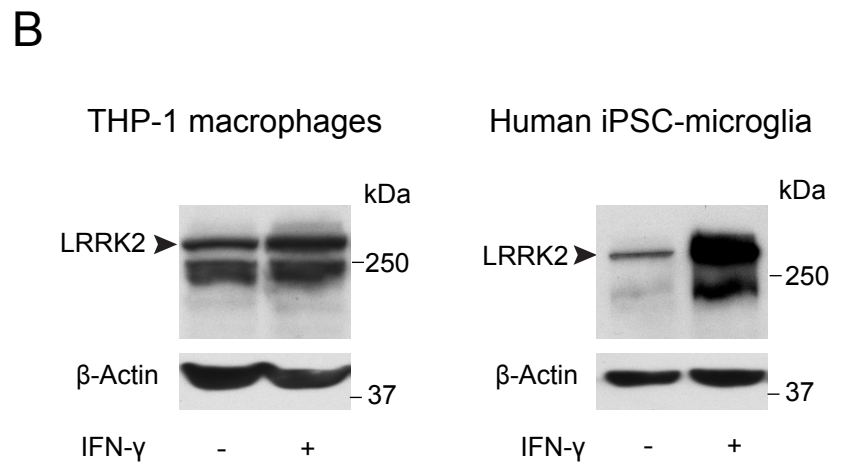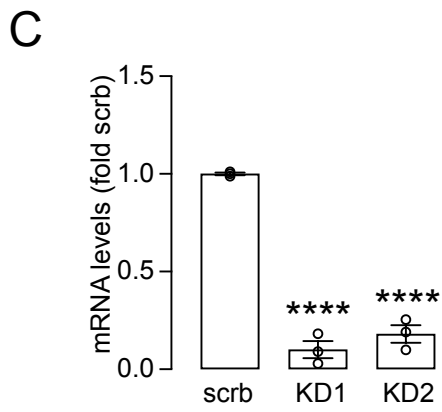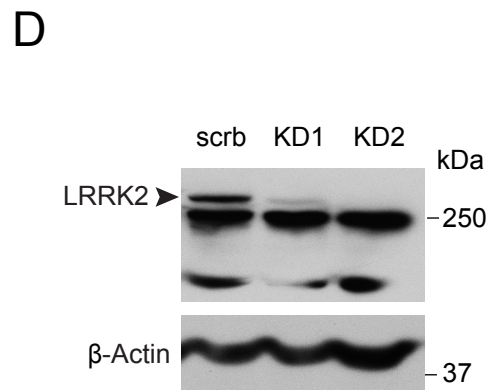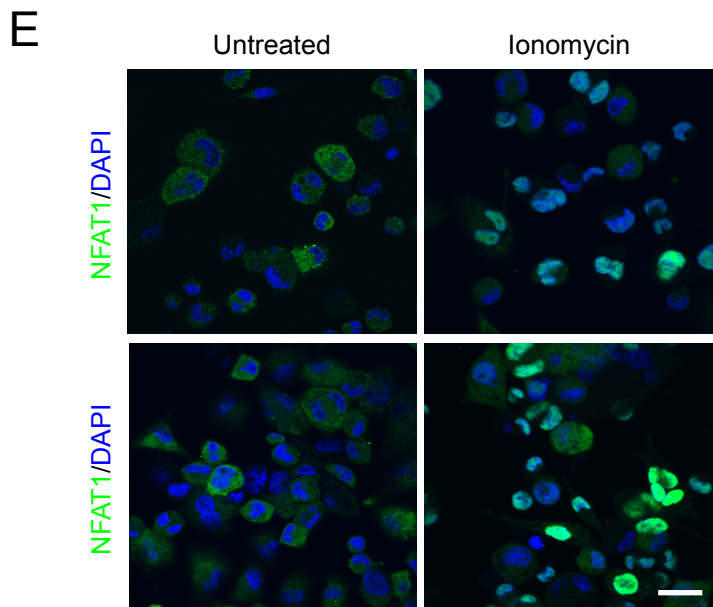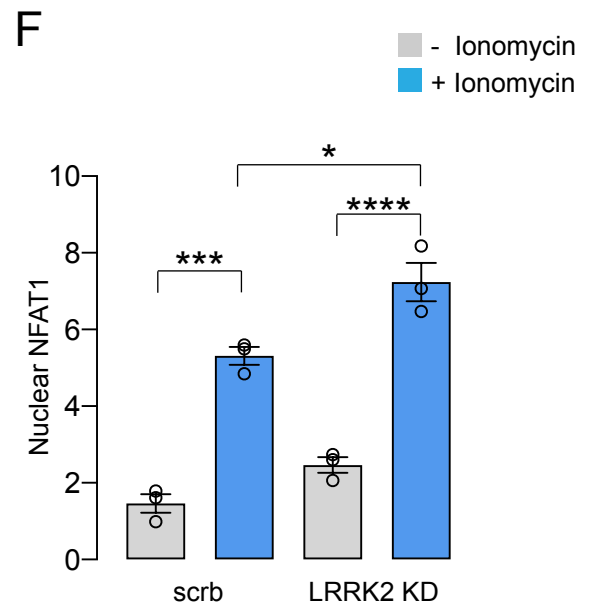

**Supplementary Figure 6. LRRK2 negatively regulates NFAT in human macrophages.** **(A)** mRNA expression of NFAT isoforms in control iPSC-derived microglia measured by qRT-PCR (mean  $\pm$  SEM; n=3 independent experiments). **(B)** THP-1 cells were differentiated into macrophages with 25 ng/mL phorbol-12-myristate-13-acetate (PMA) for 48 hrs. THP-1 macrophages (left panel) and human iPSC-derived microglia (right panel) were treated with 200 IU/mL IFN- $\gamma$  for 72 hrs or left untreated. LRRK2 levels were assessed by Western blot (n=3 independent experiments). **(C)** Knockdown (KD) efficiency of two different *LRRK2*-targeting shRNAs (KD1 and KD2) in THP-1 cells determined by qRT-PCR, expressed as fold change over scramble (scrb) non-targeting shRNA (mean  $\pm$  SEM, two-tailed t-test, \*\*\*\* $P$ <0.0001; n=3 independent experiments). **(D)** Representative Western blot of LRRK2 showing knockdown efficiency in THP-1 macrophages. **(E)** Immunostaining for NFAT1 in scrb and *LRRK2* KD THP-1 macrophages. Cells were stimulated with 1  $\mu$ M Ionomycin for 30 min or left untreated. NFAT1 (green), DAPI (blue). Scale bar, 20  $\mu$ m. **(F)** Quantification of nuclear NFAT1 fluorescent intensity (mean  $\pm$  SEM, two-way Anova with Bonferroni post hoc, \*\*\*\* $P$ <0.0001, \*\*\* $P$ =0.0002, \* $P$ =0.0166; n=3 independent experiments).

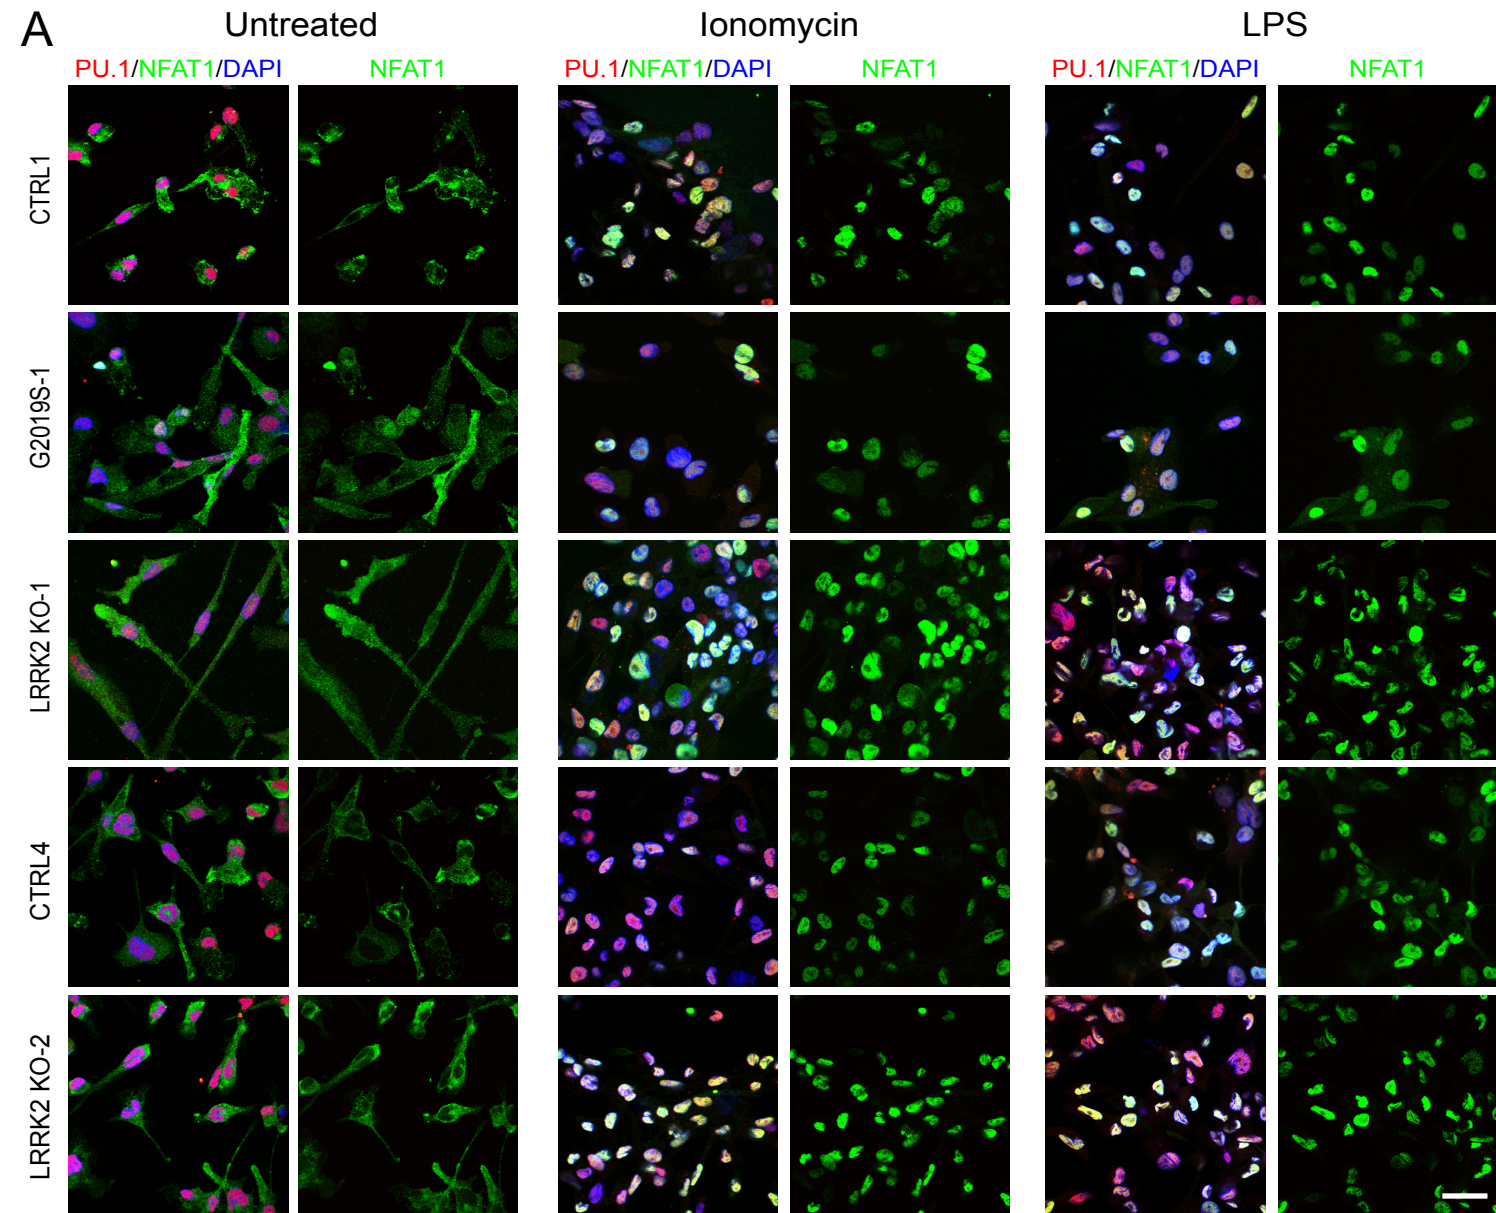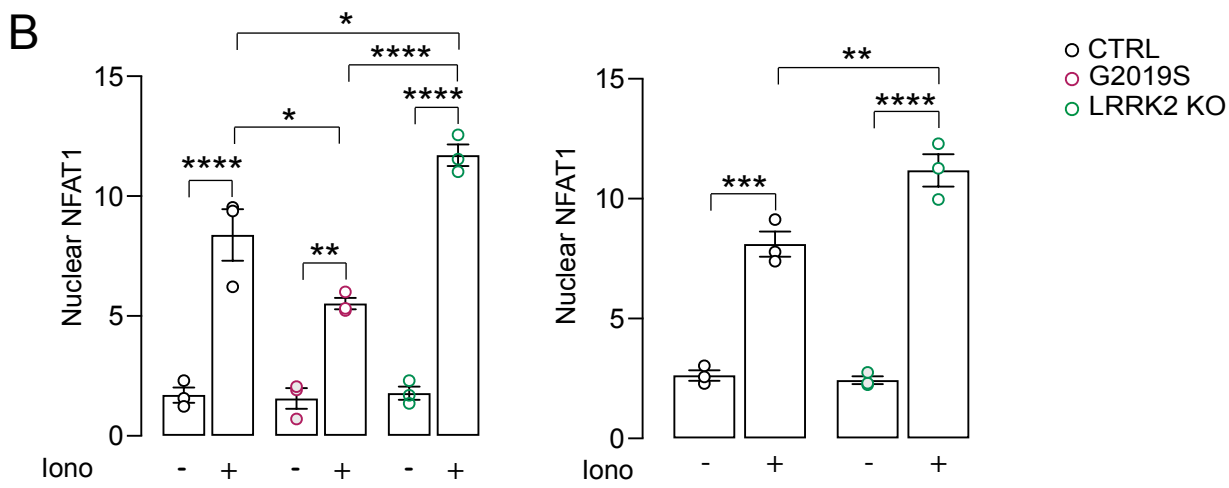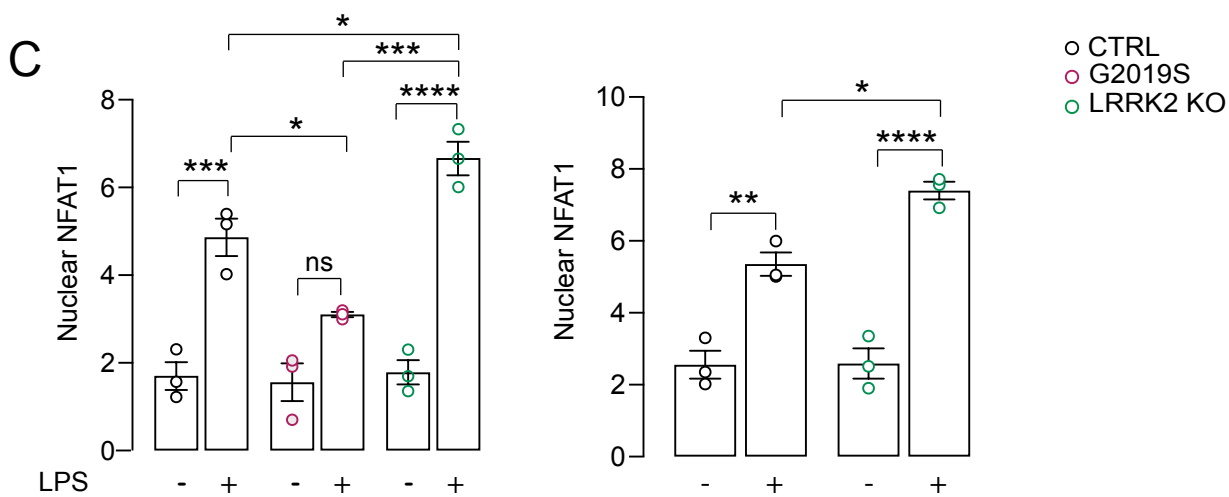

**Supplementary Figure 7. LRRK2 negatively regulates NFAT in human iPSC-derived microglia.**

**(A)** Immunostaining for NFAT1 in isogenic CTRL, G2019S, and *LRRK2* KO iPSC-derived microglia. Cells were stimulated with 500 nM ionomycin or 100 ng/mL LPS for 30 min or left untreated. PU-1 (red), NFAT1 (green) and DAPI (blue) staining is shown. Scale bar, 20  $\mu$ m. **(B, C)** Quantification of nuclear NFAT1 fluorescent intensity upon Ionomycin (B) or LPS (C) treatment in CTRL, *LRRK2* G2019S, and *LRRK2* KO iPSC-derived microglia (left panels) and a second CTRL and *LRRK2* KO isogenic couple (right panels) (mean  $\pm$  SEM, two-way ANOVA, Bonferroni post hoc, \*\*\*\* $P$ <0.0001, \*\*\* $P$ =0.0001, 0.0004, 0.0001 in sequence, \*\* $P$ =0.0038, 0.0075, 0.0029 in sequence, \* $P$ =0.0449, 0.0152, 0.0485, 0.0412, 0.0197 in sequence; n=3 independent experiments).



**A**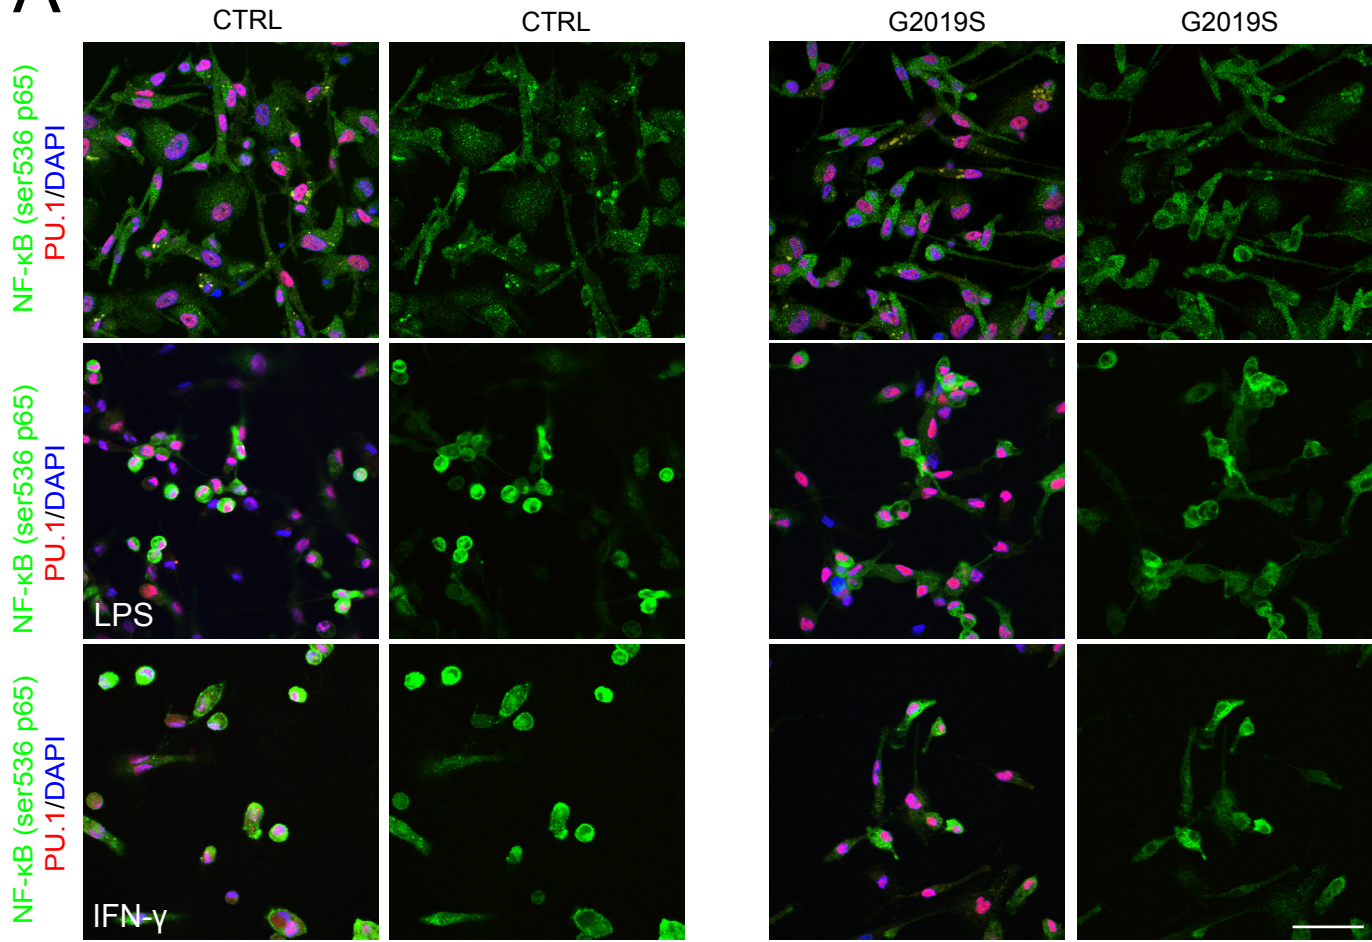**B**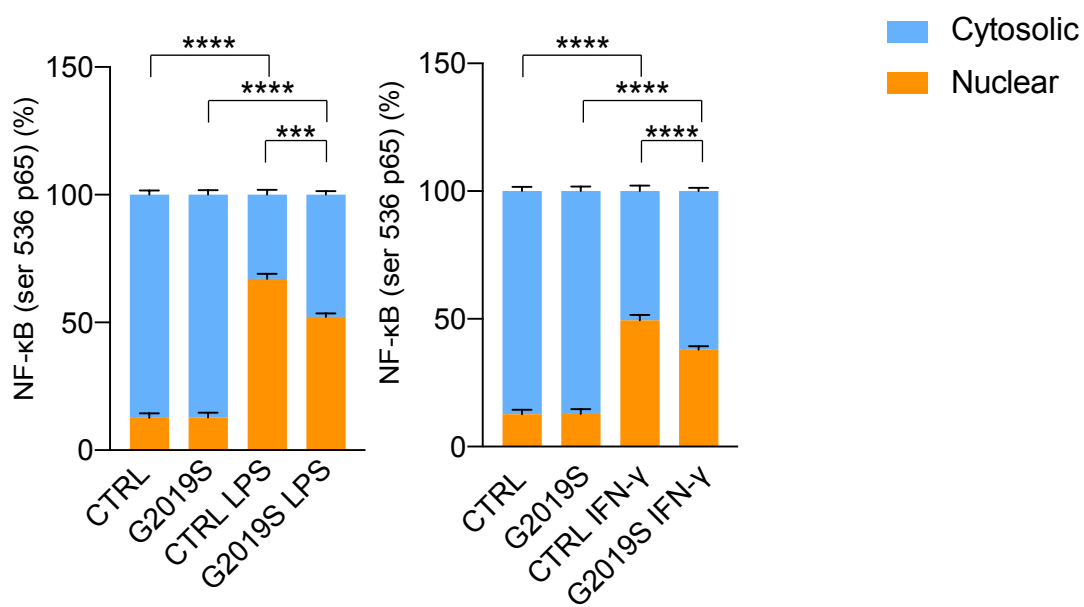



**Supplementary Figure 8. NF- $\kappa$ B p65 nuclear shuttling is impaired in *LRRK2* G2019S microglia.**

**(A)** Immunostaining for phospho-NF- $\kappa$ B p65 (Ser536) in isogenic CTRL and G2019S iPSC-derived microglia. Cells were treated with 100 ng/mL LPS for 24 hrs, 200 IU/mL IFN- $\gamma$  for 24 hrs or left untreated. PU-1 (red), phospho-NF- $\kappa$ B (green) and DAPI (blue) staining is shown. Scale bar, 50  $\mu$ m.

**(B)** Quantification of nuclear and cytosolic phospho-NF- $\kappa$ B staining in CTRL and G2019S iPSC-derived microglia with or without LPS (left panel) or IFN- $\gamma$  (right panel) treatment (mean  $\pm$  SEM, two-way ANOVA, Bonferroni post hoc, \*\*\*\* $P$ <0.0001, \*\*\* $P$ =0.001; n=5 independent experiments).

**A**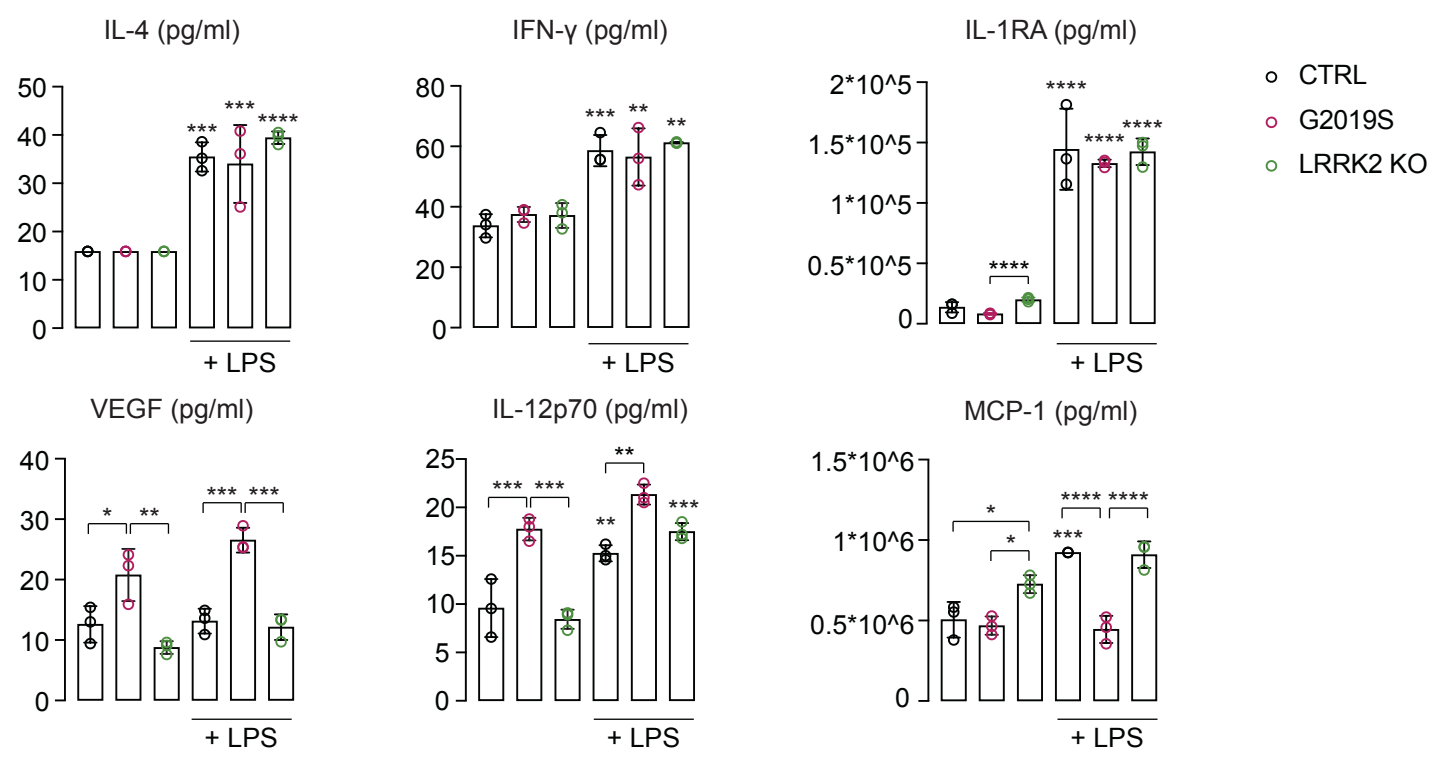**B**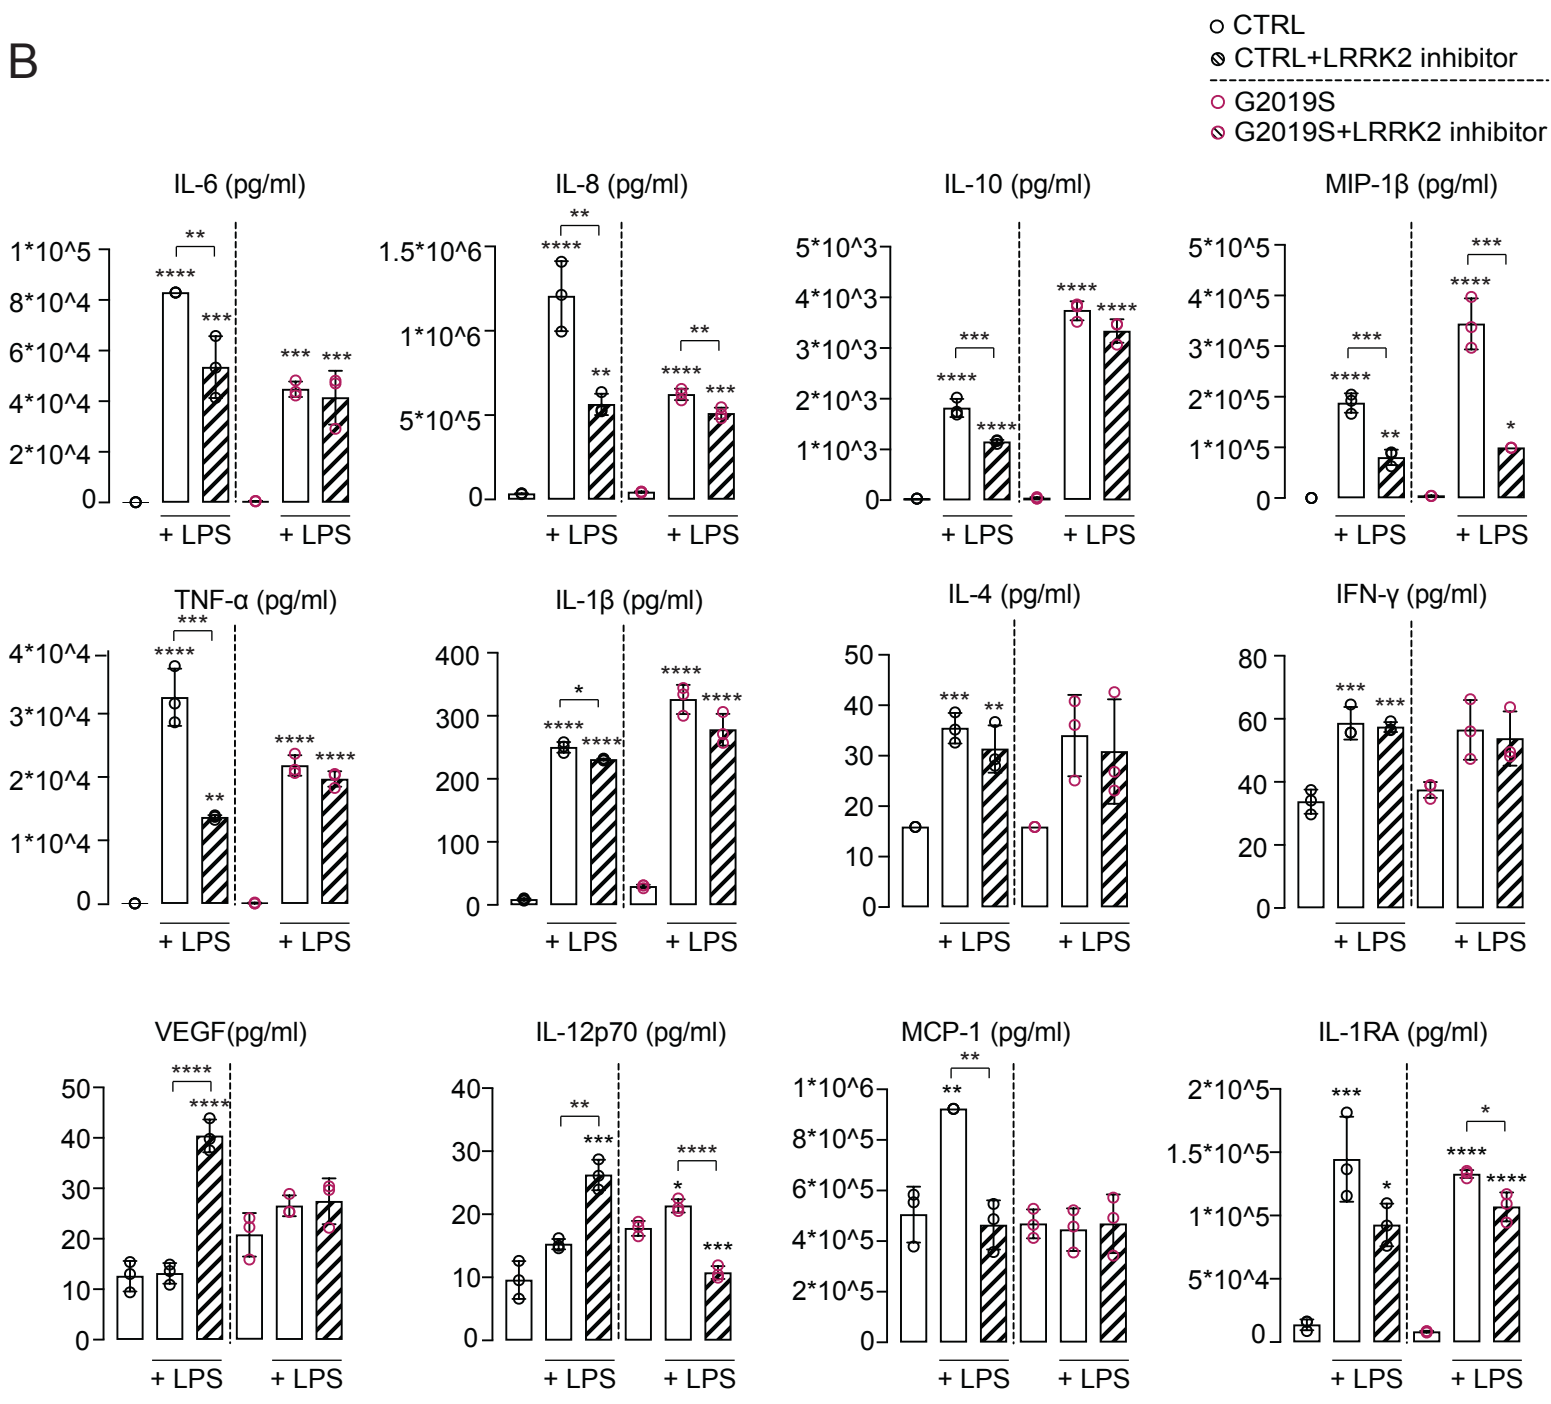

**Supplementary Figure 9. LRRK2 regulates cytokine production in human iPSC-derived microglia.** **(A)** CTRL, *LRRK2* G2019S, and *LRRK2* KO iPSC-derived microglia were treated with 100 ng/mL LPS for 24 hrs or left untreated, and cytokine levels were measured by Multiplex Elisa. Concentration of individual cytokines is shown (mean  $\pm$  SEM, two-way ANOVA, Bonferroni post hoc, \*\*\*\* $P$ <0.0001, \*\*\* $P$ <0.001, \*\* $P$ <0.01, \* $P$ <0.05; n=3 independent experiments). **(B)** CTRL and G2019S iPSC-derived microglia were treated with 100ng/mL LPS for 24hrs with or without prior LRRK2 kinase inhibition with 100nM Mli-2. Concentration of individual cytokines, measured by Multiplex Elisa, is shown (mean  $\pm$  SEM, one-way ANOVA, Bonferroni post hoc, \*\*\*\* $P$ <0.0001, \*\*\* $P$ <0.001, \*\* $P$ <0.01, \* $P$ <0.05; n=3 independent experiments).

**A**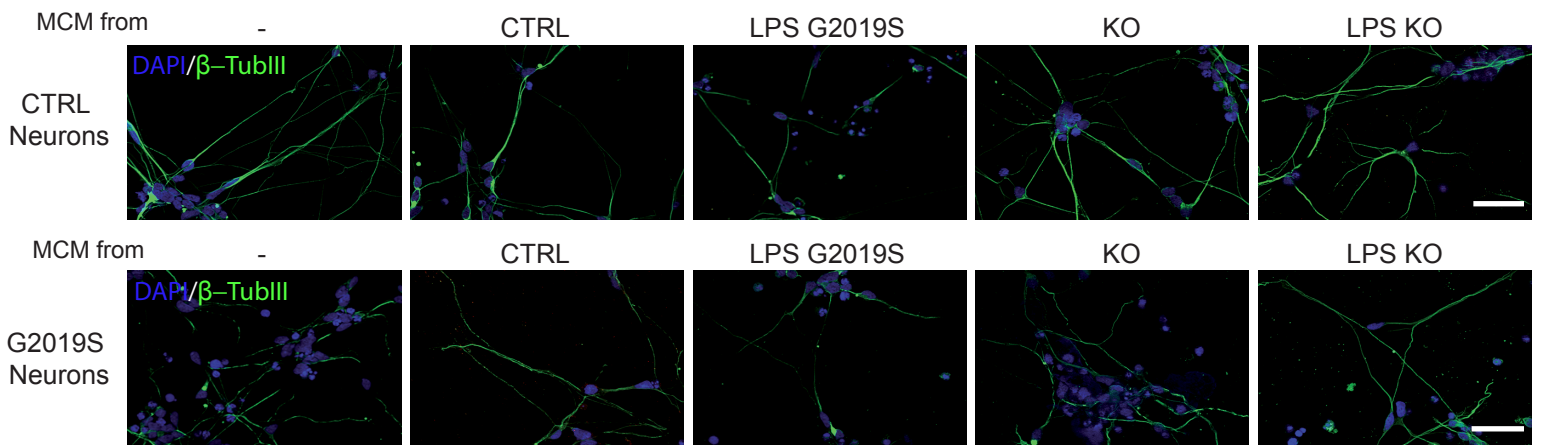**B**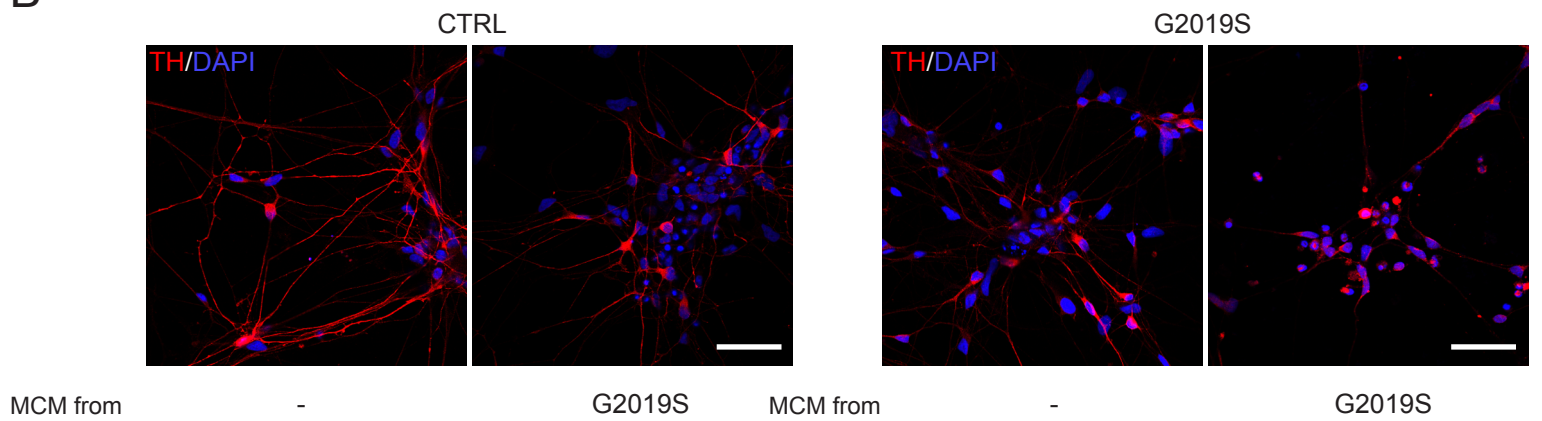**C**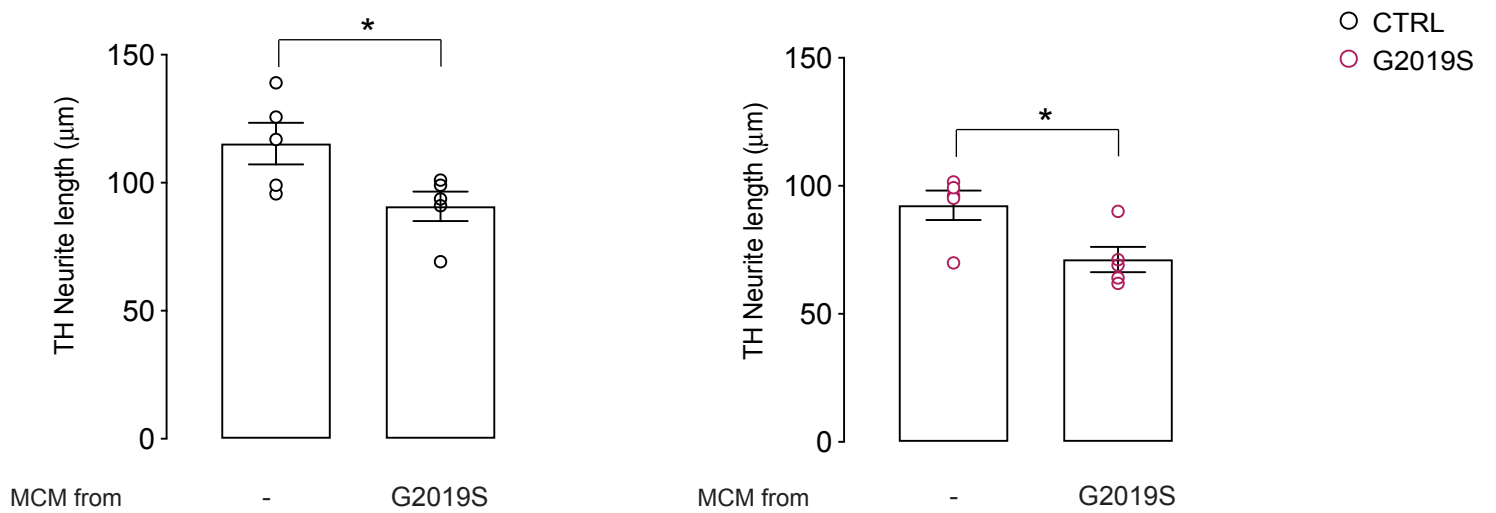

**Supplementary Figure 10. *LRRK2* G2019S microglia activation induces neurite shortening in conditioned-medium experiments.** CTRL and G2019S iPSC-derived neurons were exposed to isogenic CTRL, G2019S, or *LRRK2* KO LPS-activated microglial-conditioned media (MCM). **(A)** Representative images of  $\beta$ -TubIII immunostaining (green) showing neurite elongation in *LRRK2* G2019S and isogenic control iPSC-derived neurons stimulated with MCM. DAPI staining (blue). Scale bars, 50  $\mu$ m. **(B)** Representative images of TH immunostaining (red) showing neurite elongation in *LRRK2* G2019S and isogenic control iPSC-derived neurons stimulated with MCM. DAPI staining (blue). Scale bars, 50  $\mu$ m. **(C)** Quantification of TH-positive neurite elongation in control (left panel) and *LRRK2* G2019S (right panel) iPSC-derived neurons as shown on B (mean  $\pm$  SEM, two-tailed t-test, \*P=0.0391, 0.0237 in sequence; n=5 independent experiments).
